# Supplementary material for: Self-Organization of Microcircuits in Networks of Spiking Neurons with Plastic Synapses
Source: PubMed Central journal article supplement (PMC4546203; doi:10.1371/journal.pcbi.1004458), 2015-08-20
Supplement: pcbi.1004458.s003.pdf [file pcbi.1004458.s003.pdf]

## Supplemental Material S3 Text: Motif plasticity in homogenous networks

If all neurons have the same weighted in- and out-degrees, then the motif dynamics simplify considerably. In such a homogenous network, divergent motifs obey:

$$\begin{aligned}
 \frac{dq^{\text{div}}}{dt} &= \frac{2}{N^3} \sum_{i,j,k} \mathbf{w}_{ik} \frac{d\mathbf{W}_{jk}}{dt} - 2p \frac{dp}{dt} \\
 &= \frac{2}{N^3} \sum_k \left( \sum_i \mathbf{w}_{ik} \sum_j \frac{d\mathbf{W}_{jk}}{dt} \right) - 2p \frac{dp}{dt} \\
 &= \frac{2}{N^3} Np \sum_{j,k} \frac{d\mathbf{W}_{jk}}{dt} - 2p \frac{dp}{dt} \\
 &= 2p \frac{dp}{dt} - 2p \frac{dp}{dt} = 0
 \end{aligned} \tag{1}$$

Convergent and chain motifs are also neutrally stable. So, it is inhomogeneities in the network structure that give rise to drift of the motif structure.
