# Supplementary material for: Self-Organization of Microcircuits in Networks of Spiking Neurons with Plastic Synapses
Source: PubMed Central journal article supplement (PMC4546203; doi:10.1371/journal.pcbi.1004458), 2015-08-20
Supplement: pcbi.1004458.s004.pdf [file pcbi.1004458.s004.pdf]

## Supplemental Material S4 Text: Motif plasticity with weight-dependent (multiplicative) STDP

The multiplicative STDP rule [1, 2] is:

$$\epsilon L(s) = \begin{cases} (\epsilon W^{\max} - \mathbf{W}_{ij}) f_+ e^{-\frac{|s|}{\tau_+}}, & \text{if } s \geq 0 \\ (\mathbf{W}_{ij}) (-f_-) e^{-\frac{|s|}{\tau_-}}, & \text{if } s \leq 0, \end{cases} \quad (1)$$

Each weight has a stable fixed point:

$$\mathbf{W}_{ij}^* = \mathbf{W}_{ij}^0 \frac{f_+ \tau_+}{f_+ \tau_+ + f_- \tau_-} W^{\max} \quad (2)$$

Now the mean weight and two-synapse motifs evolve according to:

$$\epsilon \frac{dp}{dt} = \frac{1}{N^2} \sum_{i,j} \mathbf{W}_{ij}^0 \int_{-\infty}^{\infty} \epsilon L(s) (r_i r_j + \delta_{ij} \mathbf{C}_{ij}^0(s)) ds \quad (3)$$

$$\epsilon^2 \frac{dq^{\text{div}}}{dt} = \frac{2}{N^3} \sum_{i,j,k} \mathbf{W}_{ik} \mathbf{W}_{jk}^0 \int_{-\infty}^{\infty} \epsilon L(s) (r_j r_k + \delta_{jk} \mathbf{C}_{jk}^0(s)) ds - 2\epsilon^2 p \frac{dp}{dt} \quad (4)$$

$$\epsilon^2 \frac{dq^{\text{con}}}{dt} = \frac{2}{N^3} \sum_{i,j,k} \mathbf{W}_{ik} \mathbf{W}_{ij}^0 \int_{-\infty}^{\infty} \epsilon L(s) (r_i r_j + \delta_{ij} \mathbf{C}_{ij}^0(s)) ds - 2\epsilon^2 p \frac{dp}{dt} \quad (5)$$

$$\epsilon^2 \frac{dq^{\text{div}}}{dt} = \frac{2}{N^3} \sum_{i,j,k} \mathbf{W}_{ij} \mathbf{W}_{jk}^0 \int_{-\infty}^{\infty} \epsilon L(s) (r_j r_k + \delta_{jk} \mathbf{C}_{jk}^0(s)) ds - 2\epsilon^2 p \frac{dp}{dt} \quad (6)$$

where we only examine the contribution of firing rates to the plasticity, assuming that the pre- and post-synaptic neurons' spike trains are uncorrelated. This corresponds to the observation that with multiplicative STDP, the weight-dependence of  $L(s)$  dominates the dynamics of the weights. Inserting Eq. (1) and the motif definitions and assuming homogenous firing rates yields:

$$\frac{1}{\epsilon} \frac{dp}{dt} = r^2 (p_0 W^{\max} f_+ \tau_+ - p (f_+ \tau_+ + f_- \tau_-)) \quad (7)$$

$$\frac{1}{\epsilon} \frac{dq^{\text{div}}}{dt} = 2r^2 (f_+ \tau_+ W^{\max} q_X^{\text{div}} - (f_+ \tau_+ + f_- \tau_-) q^{\text{div}}) \quad (8)$$

$$\frac{1}{\epsilon} \frac{dq^{\text{con}}}{dt} = 2r^2 (f_+ \tau_+ W^{\max} q_X^{\text{con}} - (f_+ \tau_+ + f_- \tau_-) q^{\text{con}}) \quad (9)$$

$$\frac{1}{\epsilon} \frac{dq^{\text{ch}}}{dt} = r^2 \left( f_+ \tau_+ W^{\max} (q_X^{\text{ch,A}} + q_X^{\text{ch,B}}) - 2(f_+ \tau_+ + f_- \tau_-) q^{\text{ch}} \right) \quad (10)$$

The mixed divergent motifs obey:

$$\frac{dq_X^{\text{div}}}{dt} = r^2 (f_+ \tau_+ W^{\max} q_0^{\text{div}} - (f_+ \tau_+ + f_- \tau_-) q_X^{\text{div}}) \quad (11)$$

and  $q_X^{\text{con}}$ ,  $q_X^{\text{ch,A}}$  and  $q_X^{\text{ch,B}}$  obey exactly analogous equations. Defining  $q_X^{\text{ch}} = q_X^{\text{ch,A}} + q_X^{\text{ch,B}}$  puts the dynamics of  $q^{\text{ch}}$  into the same form as those for  $q^{\text{div}}$  and  $q^{\text{con}}$ . Dropping the motif labels, since they obey the same dynamics, yields a three-dimensional system for  $(p, q, q_X)$  with steady state

$$\begin{pmatrix} p \\ q \\ q_X \end{pmatrix}^* = \begin{pmatrix} \frac{f_+ \tau_+}{f_+ \tau_+ + f_- \tau_-} p_0 W^{\max} \\ \left( \frac{f_+ \tau_+}{f_+ \tau_+ + f_- \tau_-} W^{\max} \right)^2 q_0 \\ \frac{f_+ \tau_+}{f_+ \tau_+ + f_- \tau_-} W^{\max} q_0 \end{pmatrix} \quad (12)$$

and Jacobian:

$$\begin{pmatrix} -(f_+\tau_+ + f_-\tau_-) & 0 & 0 \\ 0 & -(f_+\tau_+ + f_-\tau_-) & f_+\tau_+W^{\max} \\ 0 & 0 & -(f_+\tau_+ + f_-\tau_-) \end{pmatrix} \quad (13)$$

The eigenvalue of the three-dimensional multiplicative STDP system is  $-(f_+\tau_+ + f_-\tau_-)$  which is always negative, so the steady state is linearly stable. So, multiplicative STDP simply stabilizes whatever motif structure is embedded in the adjacency matrix.

## References

1. Rubin J, Lee D, Sompolinsky H (2001) Equilibrium properties of temporally asymmetric hebbian plasticity. *Physical Review Letters* 86: 364–367.
2. Van Rossum MC, Bi GQ, Turrigiano GG (2000) Stable hebbian learning from spike timing-dependent plasticity. *The Journal of Neuroscience* 20: 8812–8821.
