# Supplementary material for: Self-Organization of Microcircuits in Networks of Spiking Neurons with Plastic Synapses
Source: PubMed Central journal article supplement (PMC4546203; doi:10.1371/journal.pcbi.1004458), 2015-08-20
Supplement: pcbi.1004458.s006.pdf [file pcbi.1004458.s006.pdf]

## Supplemental Material S2 Fig: Truncated vs full spike train cross-covariances

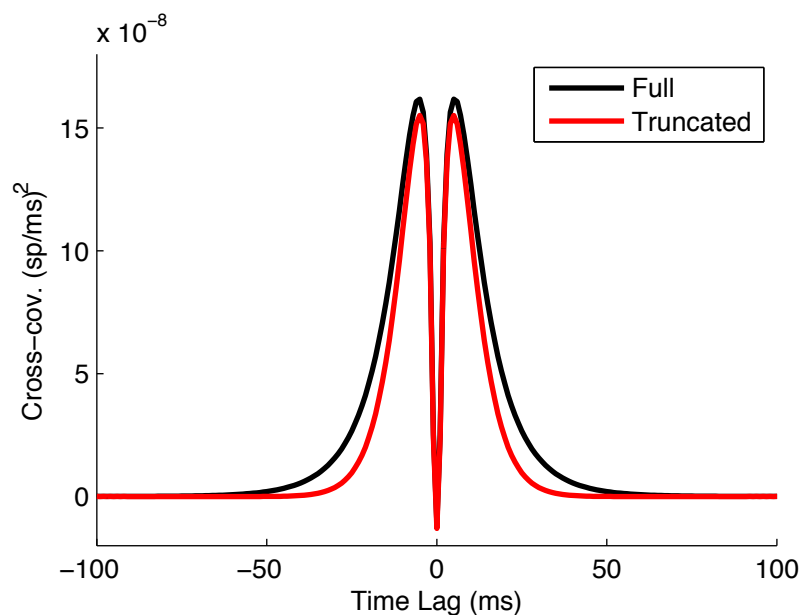

**Figure 1. Truncated vs full spike train cross-covariance functions.** Black, average spike train cross-covariance function of the network of Fig. 2. Red, truncated approximation (Eq. 7 of main text) of the average spike train cross-covariance function. When integrated against the balanced, depression dominated STDP rule, the full theory is 1.06 times as large as the truncated.
